# Supplementary material for: Magnetic porous carbon based solid-phase extraction coupled with high performance liquid chromatography for the determination of neonicotinoid insecticides in environmental water and peanut milk samples
Source: Royal Society of Chemistry journal article supplement (doi:10.1039/c4ay02990a), 2015-01-01
Supplement: c4ay02990a1.pdf [file c4ay02990a1.pdf]

## Supporting information

**Magnetic porous carbon based solid-phase extraction coupled with high performance liquid chromatography for the determination of neonicotinoid insecticides in environmental water and peanut milk samples**

Li Liu, Yunhui Hao, Xin Zhou, Chun Wang, Qiuhua Wu\*, Zhi Wang\*

*College of Science, Agricultural University of Hebei, Baoding 071001, China*

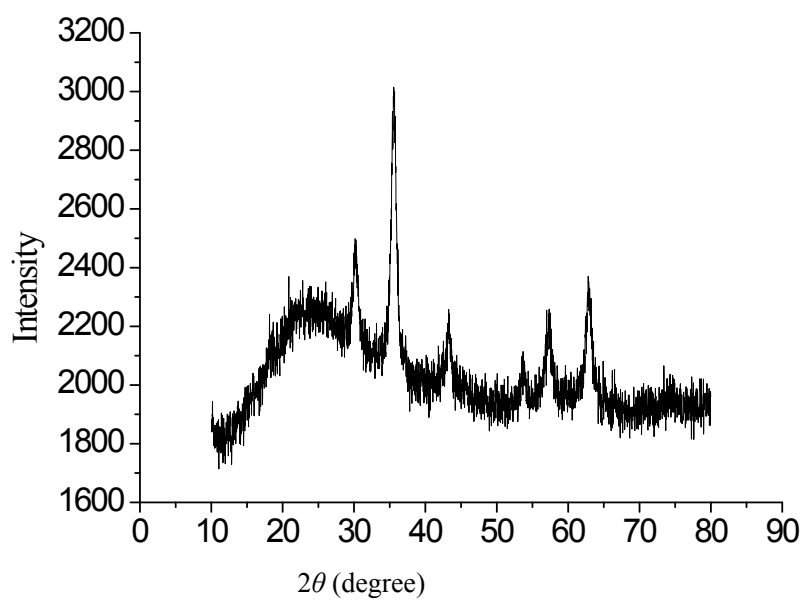

**Figure S1.** X-ray diffraction pattern of the MOPC-ZSM-5.
